# Supplementary material for: AI-based discovery and cryoEM structural elucidation of a KATP channel pharmacochaperone
Source: eLife journal article supplement (doi:10.7554/elife.103159), 2024-12-11
Supplement: fig1-figsupp1-data1 [file elife-103159-fig1-figsupp1-data1-v1.zip]

C1-10

F27S

SUR1

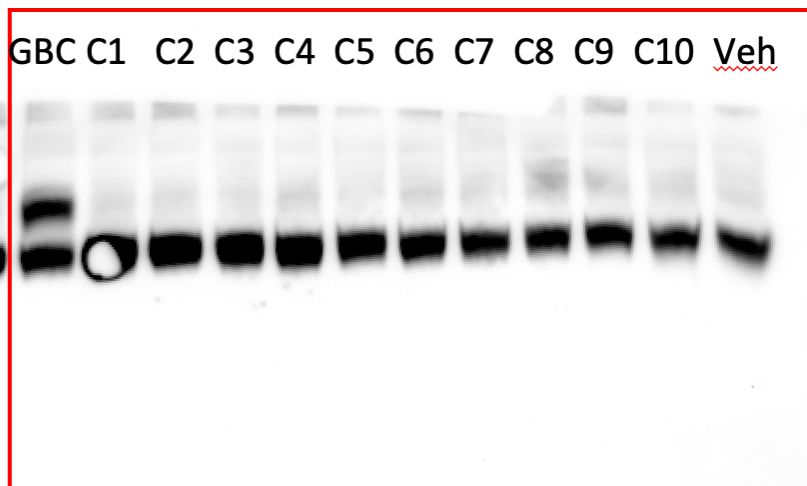

C11-20

F27S

SUR1

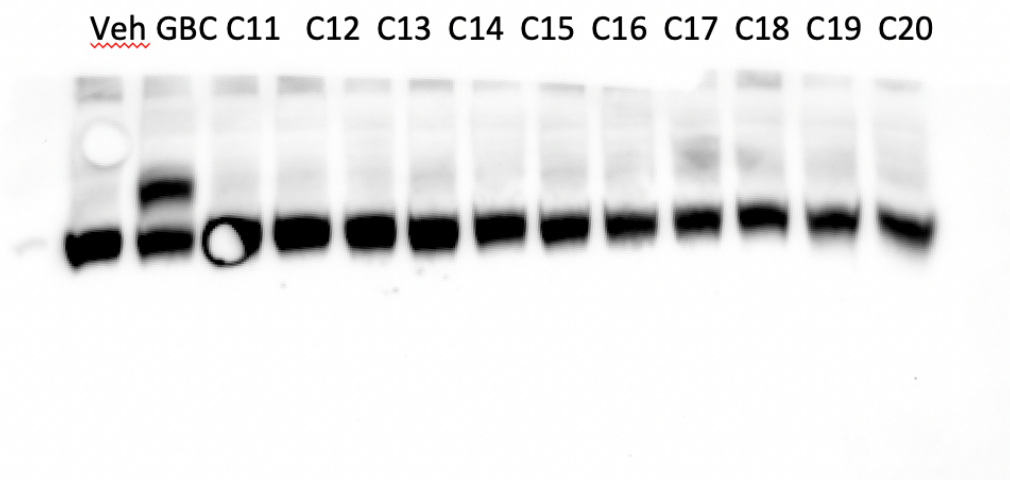

C21-30

F27S

SUR1

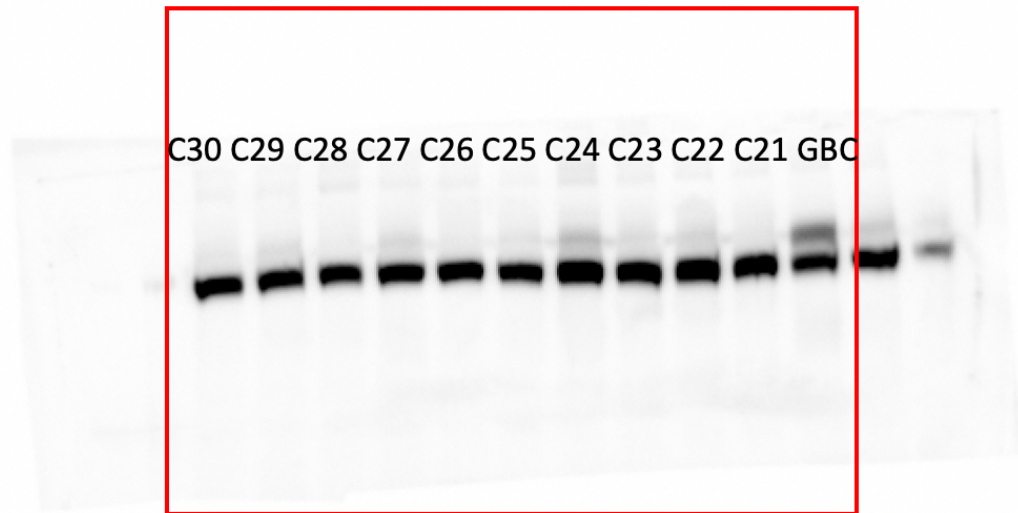

This image was horizontally flipped in Figure 1-figure supplement 1

C31- 40

F27S

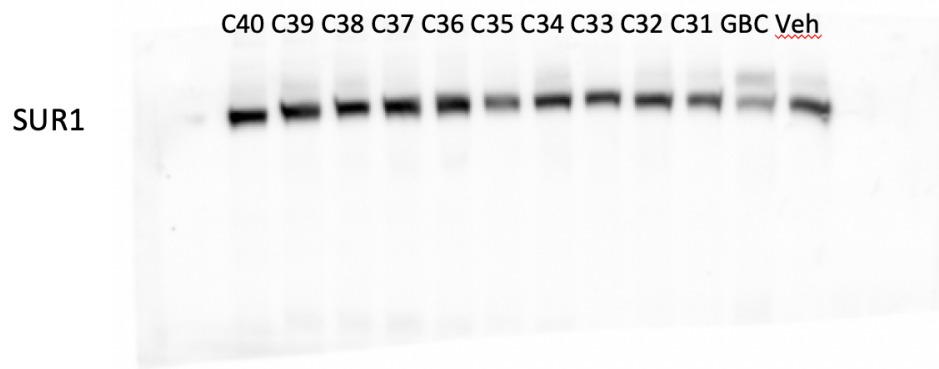

This image was horizontally flipped in Figure 1-figure supplement 1

C41-48

F27S

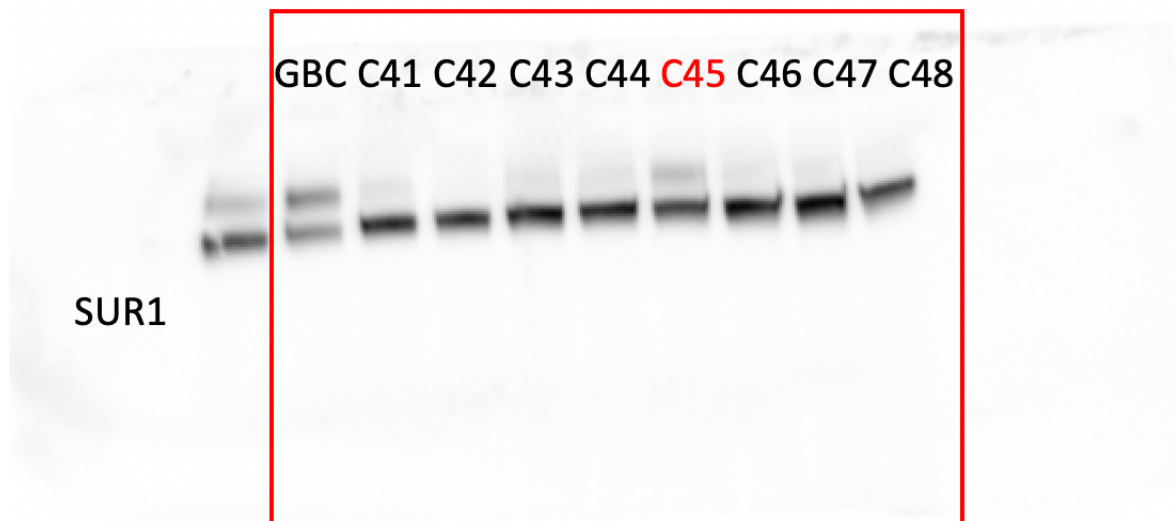

C49-59

F27S

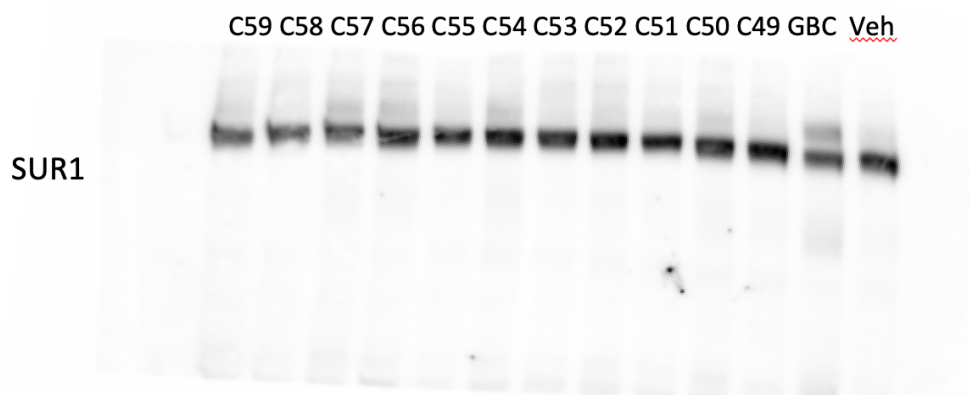

This image was horizontally flipped in Figure 1-figure supplement 1

C60-70

F27S

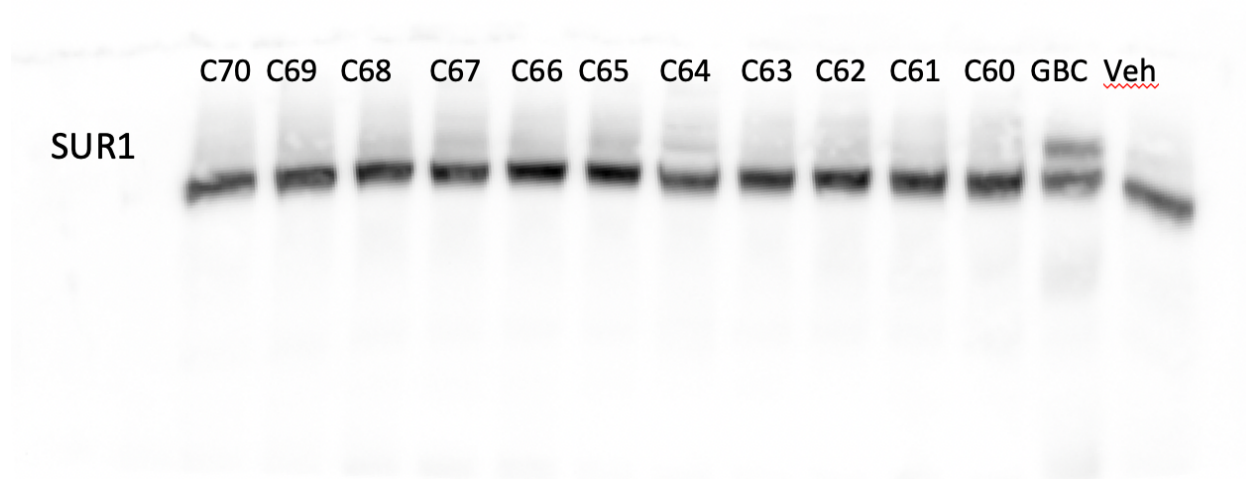

This image was horizontally flipped in Figure 1-figure supplement 1

C71-80

F27S

SUR1

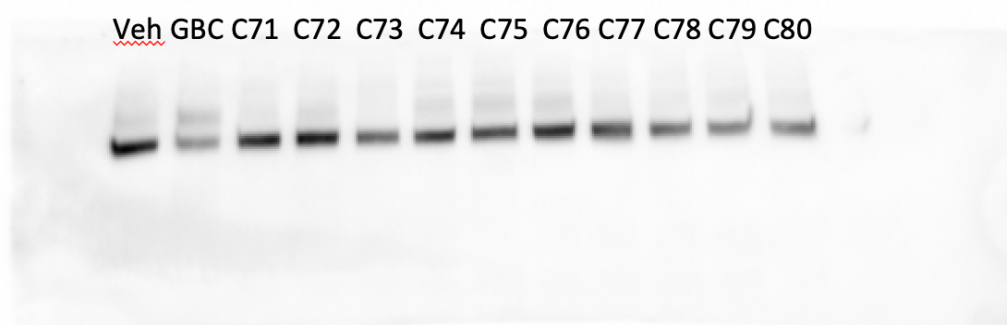



C81-92

F27S

SUR1

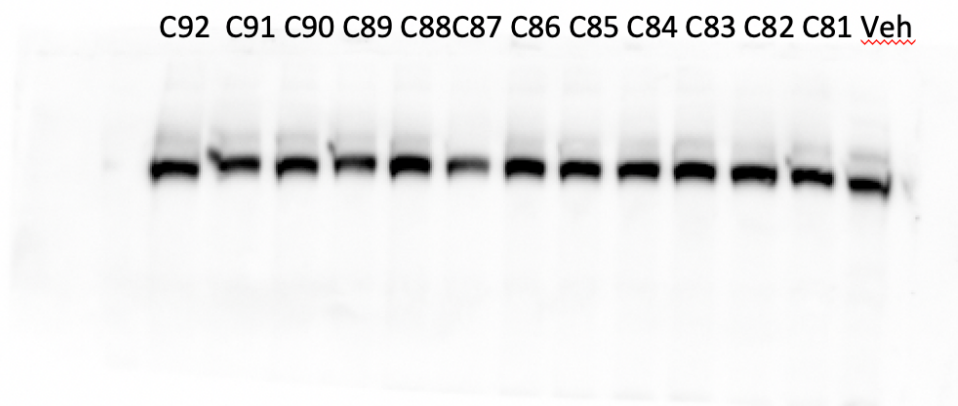

This image was horizontally flipped in Figure 1-figure supplement 1

C93-96

F27S

SUR1

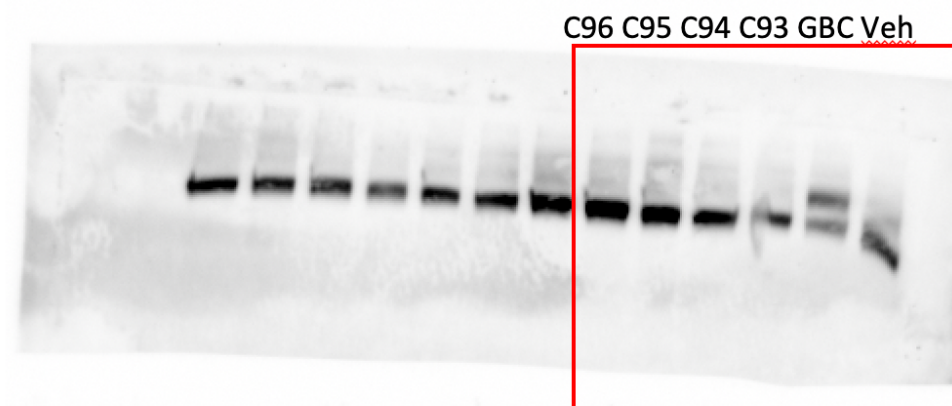

This image was horizontally flipped in Figure 1-figure supplement 1

**Figure 1-figure supplement 1, Source Data 1.** Original membrane images corresponding to the screening results of Figure 1-figure supplement 1., panel B. The red boxes indicate the specific areas shown in the figure. Please note that some of the images were horizontally flipped (as indicated below the image) in Figure 1-figure supplement 1., panel B. Bands outside these boxes are not included in the figure.
