# Supplementary material for: AI-based discovery and cryoEM structural elucidation of a KATP channel pharmacochaperone
Source: eLife journal article supplement (doi:10.7554/elife.103159), 2024-12-11
Supplement: fig2-data1 [file elife-103159-fig2-data1-v1.zip]

Figure 2 A

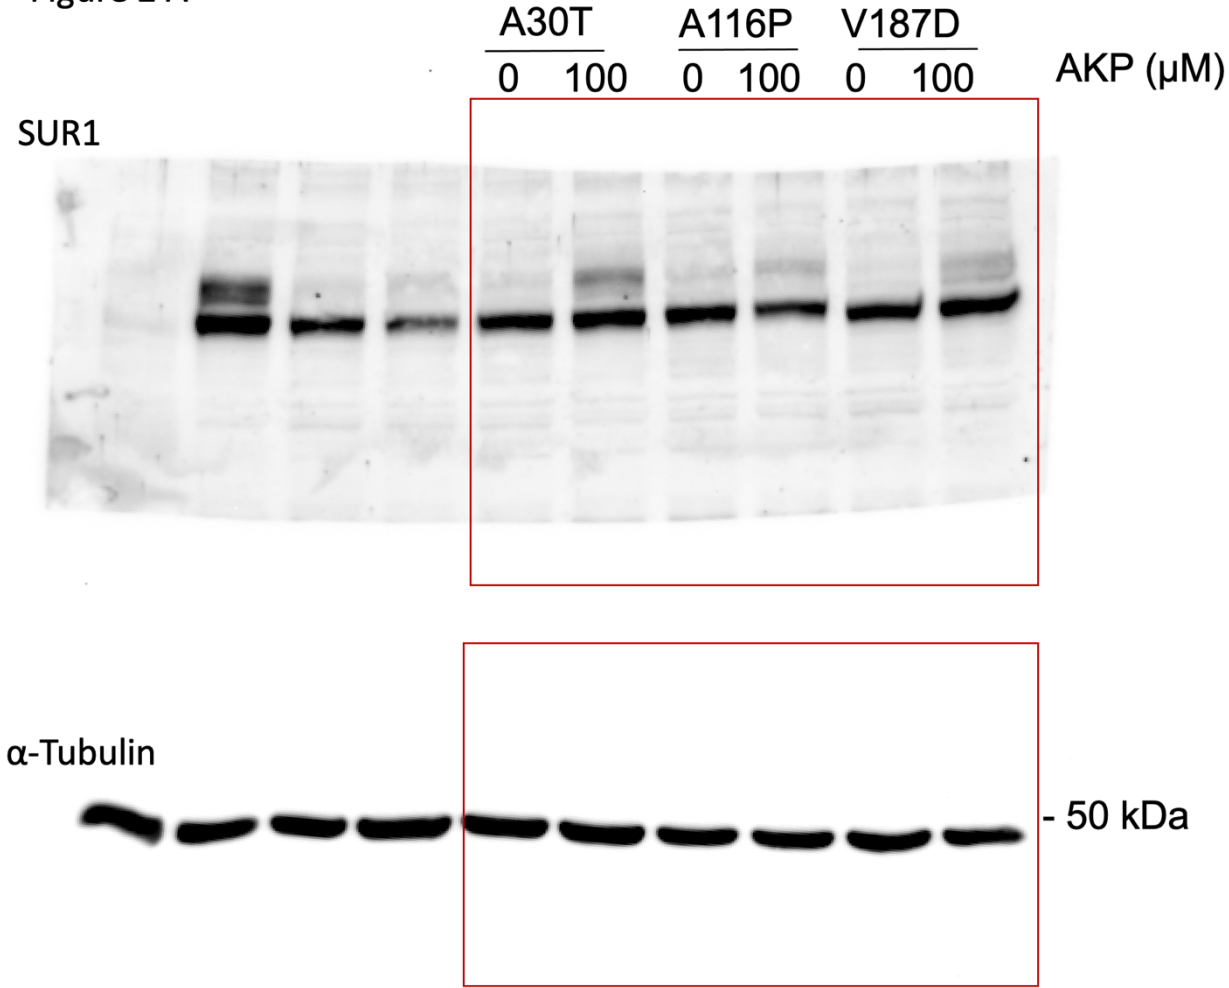

Figure 2 B

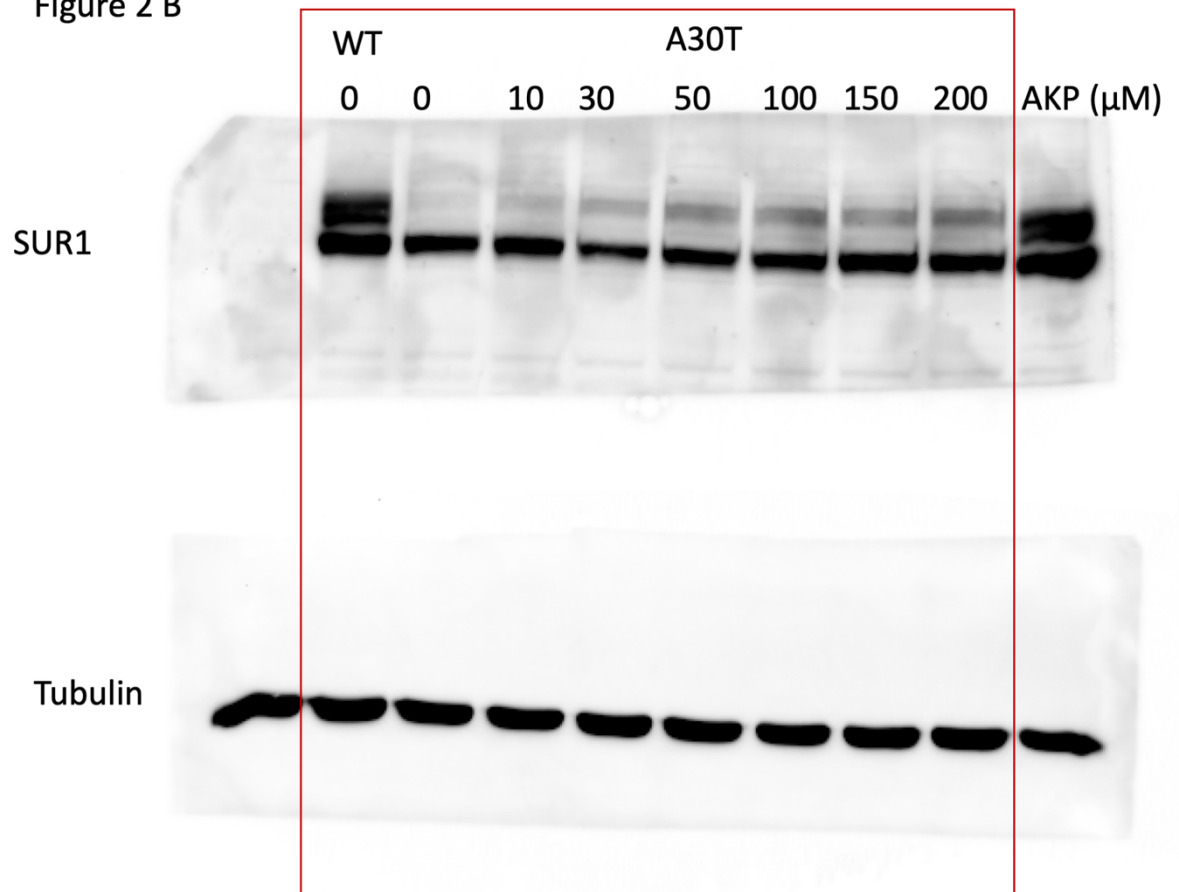

**Figure 2, Source Data 1.** Original membrane images corresponding to Figure 2, panels A and B. The red boxes highlight the specific areas represented in Figure 2. Bands outside these boxes are not included in the figure.
