# Supplementary material for: AI-based discovery and cryoEM structural elucidation of a KATP channel pharmacochaperone
Source: eLife journal article supplement (doi:10.7554/elife.103159), 2024-12-11
Supplement: fig2-figsupp2-data1 [file elife-103159-fig2-figsupp2-data1-v1.zip]

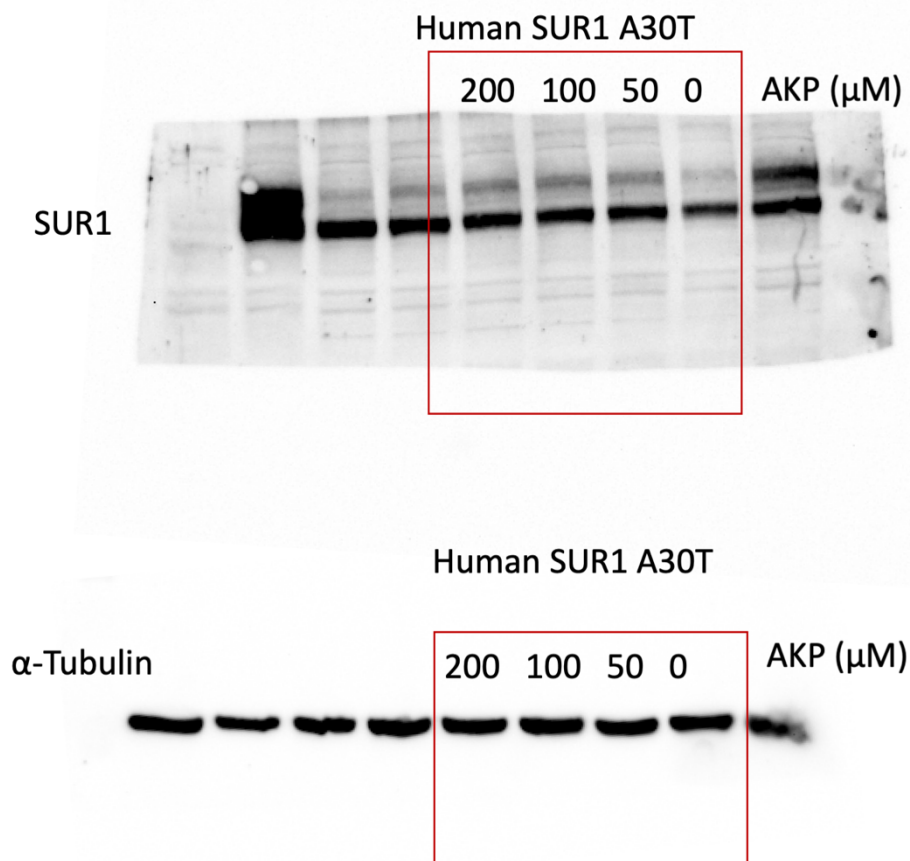

**Figure 2-figure supplement 2, Source Data 1.** Original membrane images corresponding to Figure 2-figure supplement 2, panel A. The red boxes indicate the specific areas shown in the figure. Please note that the image was horizontally flipped in Figure 2-figure supplement 2, panel A. Bands outside these boxes are not included in the figure.
